# Supplementary material for: Disparities in Excess, All-Cause Mortality among Black, Hispanic, and White Veterans at the U.S. Department of Veterans Affairs during the COVID-19 Pandemic
Source: MDPI journal article supplement (doi:10.3390/ijerph19042368), 2022-02-18
Supplement: s1 [file s1]

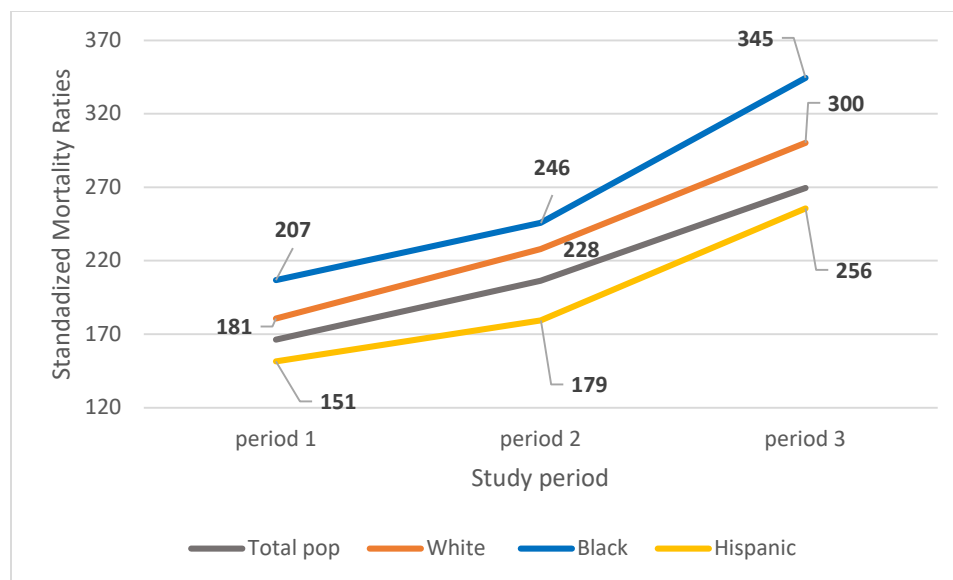

Figure S1. Standardized Mortality Rates for the yearly study periods\*, among White, Black, and Hispanic VA users aged 45 years or older, between March 2018 and February 2020

\*Period 1 March 2018 – February 2019

Period 2 March 2019 – February 2020

Period 3 March 2020 – February 2021

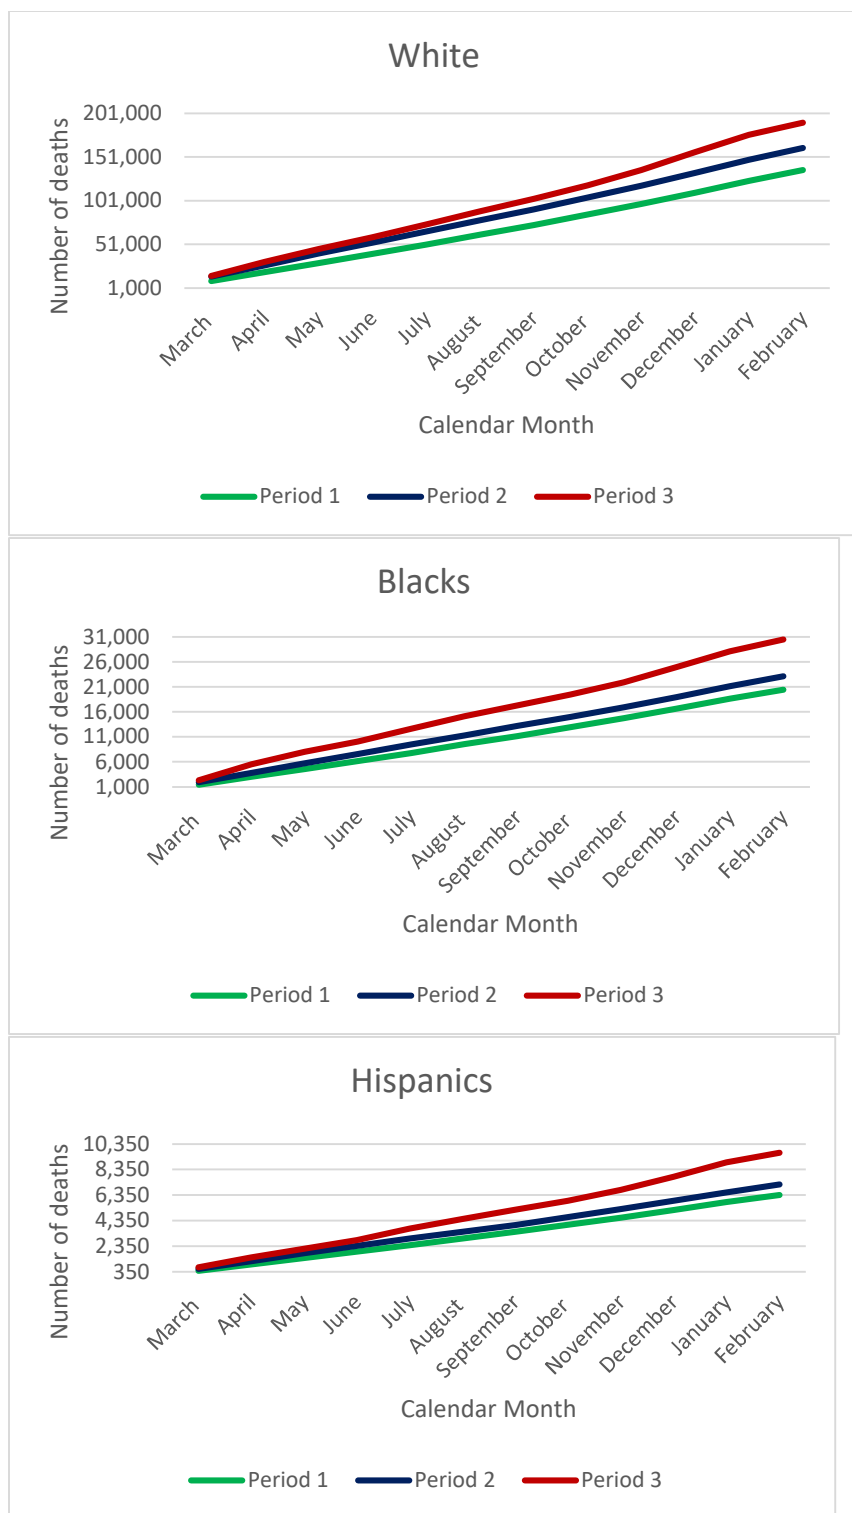

Figure S2. Cumulative death counts per study period\* by racial/ethnic group among VA users over 45 years or older, between March 2018 and February 2020.

\*Period 1 March 2018 – February 2019; Period 2 March 2019 – February 2020; Period 3 March 2020 – February 2021

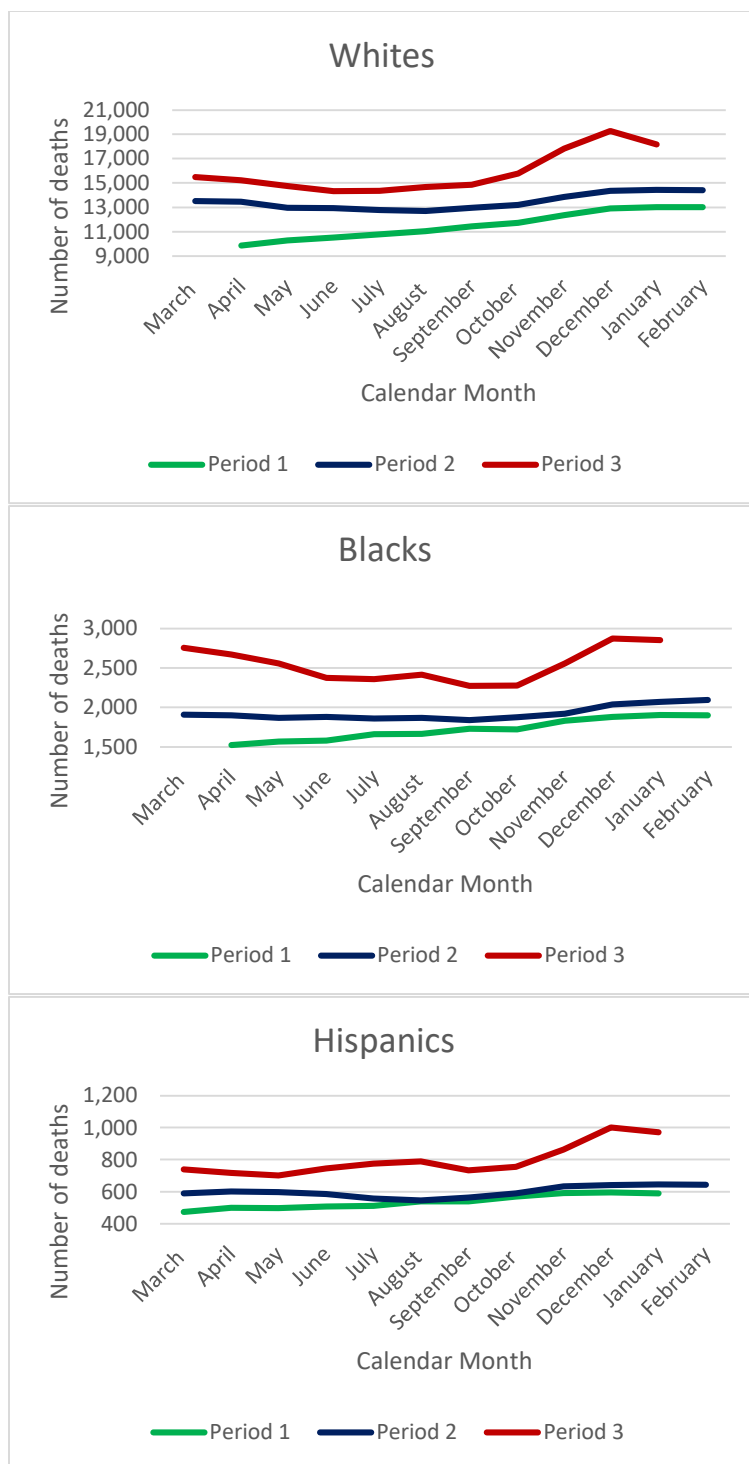

Figure S3. Monthly death counts using 3-month moving average per study period\* by racial/ethnic group among VA users over 45 years or older, between March 2018 and February 2020.

\*Period 1 March 2018 – February 2019; Period 2 March 2019 – February 2020; Period 3 March 2020 – February 2021
